# Supplementary material for: Gelation of Fmoc-diphenylalanine is a first order phase transition
Source: Royal Society of Chemistry journal article supplement (doi:10.1039/c5sm01399b), 2015-01-01
Supplement: c5sm01399b1.pdf [file c5sm01399b1.pdf]

## Gelation of Fmoc-diphenylalanine is a first order phase transition

Received 00th January 20xx,  
Accepted 00th January 20xx

### SUPPLEMENTARY INFORMATION

DOI: 10.1039/x0xx00000x

Nikola A. Dudukovic<sup>\*a</sup> and Charles F. Zukoski<sup>b</sup>

www.rsc.org/

### <sup>1</sup>H DOSY (PFGSE) NMR measurements

Pulsed field gradient spin echo nuclear magnetic resonance (PFGSE NMR) utilizes the attenuation of the echo signal from a spin-echo pulse sequence containing a magnetic field gradient pulse at each period to determine the displacement of the observed spins on timescales of milliseconds to seconds.<sup>37,38</sup> The position of a spin an ensemble of diffusing nuclei in the z-direction can be “labeled” by applying a well-defined magnetic field gradient. When a 90° gradient pulse ( $\delta$ ) is applied at time  $t_1$ , the spin experiences a phase shift, which has two terms: (1) phase shift due to the main field  $B_0$  and (2) phase shift due to the gradient  $g$ . Applying the following 180° pulse after period  $\tau$  reverses the precession sign. When the 90° echo is applied at time  $t_1 + \Delta$  the spin experiences the same main field phase shift, but the phase shift due to the gradient will differ if the molecule has moved from position  $z(t_1)$  to  $z(t_2)$ . The total phase shift at the end of the pulse echo sequence is given by:<sup>37</sup>

$$\varphi_i(2\tau) = \left\{ \gamma B_0 \tau + \gamma g \int_{t_1}^{t_1 + \delta} z_i(t) dt \right\} - \left\{ \gamma B_0 \tau + \gamma g \int_{t_1 + \Delta}^{t_1 + \Delta + \delta} z_i(t') dt' \right\} \quad (S1)$$

where  $\gamma = \omega_0/B_0$  is the gyromagnetic ratio of the Larmor frequency and strength of the static magnetic field.

Diffusion of the spins  $D_s$  can be correlated to the attenuation of a spin echo signal  $S(t)$  resulting from the dephasing of the nuclear spins due to the combination of the translational motion of the spins and the imposition of the spatially defined gradient pulses:<sup>37,38</sup>

$$\frac{dS(t)}{dt} = -\gamma^2 D_s \left[ \int_0^t g(t') dt' - 2H(t - \tau) \int_0^\tau g(t') dt' \right]^2 S(t) \quad (S2)$$

By integrating Eq. (S2) from 0 to  $2\tau$  the following relationship is obtained:

$$\ln \left[ \frac{S(2\tau)}{S(0)} \right] = -\gamma^2 g^2 D_s \delta^2 (\Delta - \delta/3) \quad (S3)$$

### Full <sup>1</sup>H NMR spectrum of Fmoc-FF in DMSO

The full <sup>1</sup>H NMR spectrum of Fmoc-FF dissolved in deuterated DMSO at volume fraction of  $\phi_{\text{Fmoc-FF}} = 0.052$  is given in **Figure S1**.

### Expressions used in calculations of $D_2$

Calculation of mobility functions  $A_{11}$  and  $A_{12}$  (Jeffrey and Onishi)<sup>34</sup>

$$A_{11} = \sum_{k=0}^{\infty} f_{2k}(\lambda) (1 + \lambda)^{-2k} s^{-2k} \quad (S4)$$

$$A_{12} = -\frac{1}{2} (1 + \lambda) \sum_{k=0}^{\infty} f_{2k+1}(\lambda) (1 + \lambda)^{-2k-1} s^{2k-1} \quad (S5)$$

where:

$$s = \frac{2r}{a_1 + a_2} \quad (S6)$$

$$\lambda = \frac{a_2}{a_1} \quad (S7)$$

For  $0 \leq k \leq 11$ , functions  $f_{2k}$  and  $f_{2k+1}$  are calculated as:

<sup>a</sup>. Address here.

<sup>b</sup>. Address here.

<sup>c</sup>. Address here.

† Footnotes relating to the title and/or authors should appear here.

Electronic Supplementary Information (ESI) available: [details of any supplementary information available should be included here]. See DOI: 10.1039/x0xx00000x

$$\begin{aligned}
 f_0 &= 1 \\
 f_1 &= -3 \\
 f_2 &= 0 \\
 f_3 &= 4 + 4\lambda^2 \\
 f_4 &= -60\lambda^3 \\
 f_5 &= 0 \\
 f_6 &= 480\lambda^3 - 128\lambda^5 \\
 f_7 &= -2400\lambda^3 \\
 f_8 &= -960\lambda^3 + 4224\lambda^5 - 576\lambda^7 \\
 f_9 &= 1920\lambda^3 + 1920\lambda^5 \\
 f_{10} &= -17920\lambda^5 - 96000\lambda^6 + 30720\lambda^7 - 2304\lambda^9 \\
 f_{11} &= -15360\lambda^3 + 231936\lambda^5 - 15360\lambda^7
 \end{aligned}$$

For  $0 \leq k \leq 11$ , functions  $f_{2k}$  and  $f_{2k+1}$  are calculated as:

$$\begin{aligned}
 f_0 &= 1 \\
 f_1 &= 3/2 \\
 f_2 &= 0 \\
 f_3 &= 2 + 2\lambda^2 \\
 f_4 &= 0 \\
 f_5 &= 0 \\
 f_6 &= -68\lambda^5 \\
 f_7 &= 0 \\
 f_8 &= -320\lambda^3 + 288\lambda^5 - 288\lambda^7 \\
 f_9 &= 0 \\
 f_{10} &= -6720\lambda^5 - 3456\lambda^7 - 1152\lambda^9 \\
 f_{11} &= 8960\lambda^3 + 8848\lambda^5 - 8960\lambda^7
 \end{aligned}$$

**Calculation of mobility functions  $B_{11}$  and  $B_{12}$  (Jeffrey and Onishi)<sup>34</sup>**

$$B_{11} = \sum_{k=0}^{\infty} f_{2k}(\lambda)(1+\lambda)^{-2k} s^{-2k} \quad (\text{S8})$$

$$B_{12} = \frac{1}{2}(1+\lambda) \sum_{k=0}^{\infty} f_{2k+1}(\lambda)(1+\lambda)^{-2k-1} s^{-2k-1} \quad (\text{S9})$$

**Perturbation of the pair distribution function  $Q$  for  $\lambda = 2$  (Batchelor)<sup>33</sup>**

The numerical solution for  $Q$  by Batchelor is given in **Figure S2**.

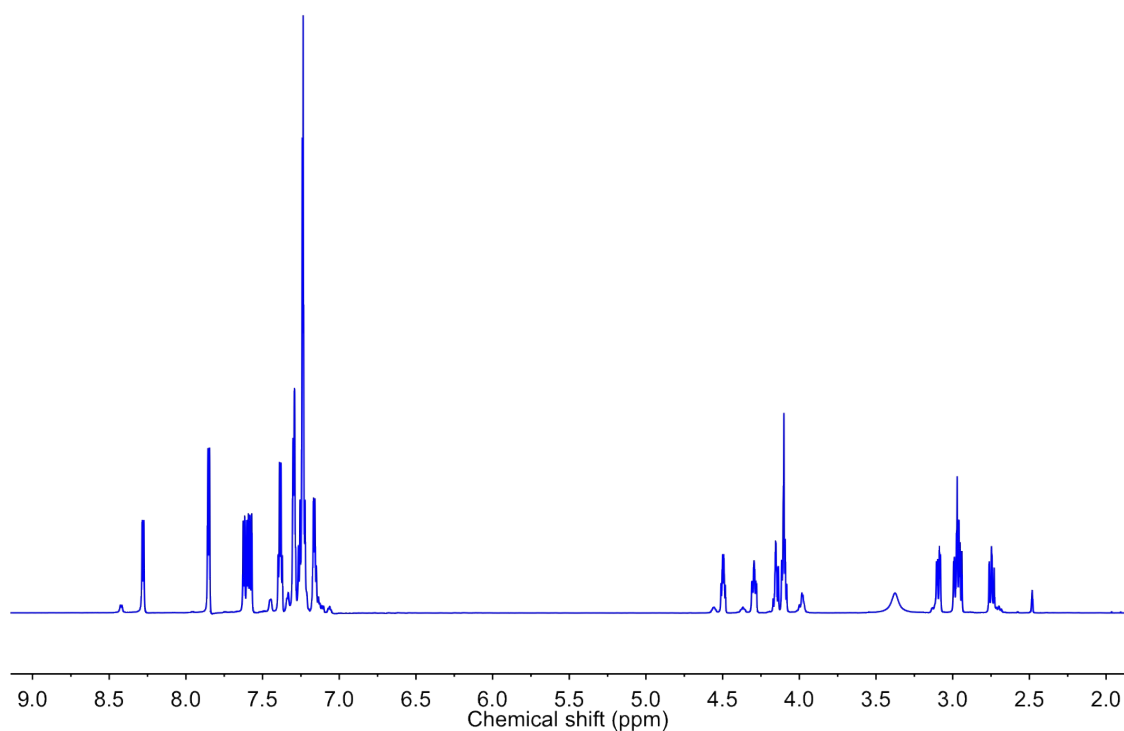

**Figure S1.**  $^1\text{H}$  NMR spectrum of Fmoc-FF in deuterated DMSO.

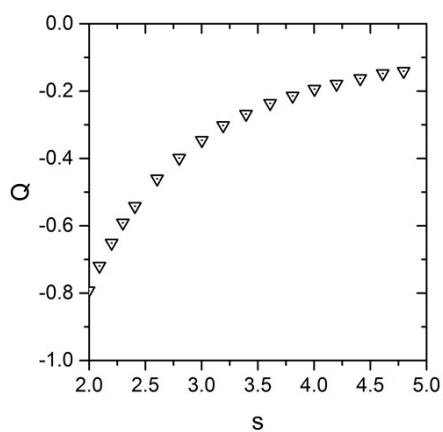

Figure S2. Numerical solution for pair distribution function  $Q$  ( $\lambda = 2$ ).<sup>33</sup>

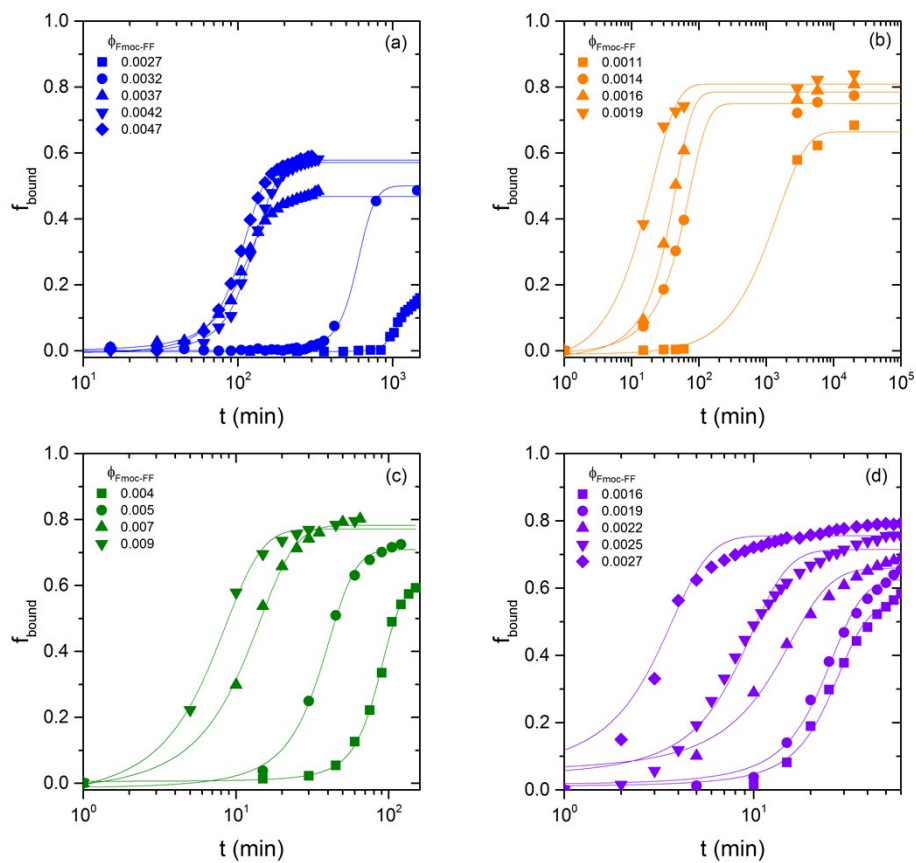

Figure S3. Fraction of Fmoc-FF molecules bound in the solid phase at various Fmoc-FF volume fractions and water concentrations  $x_{H_2O}$  of: (a) 0.25; (b) 0.30; (c) 0.35; (d) 0.40.

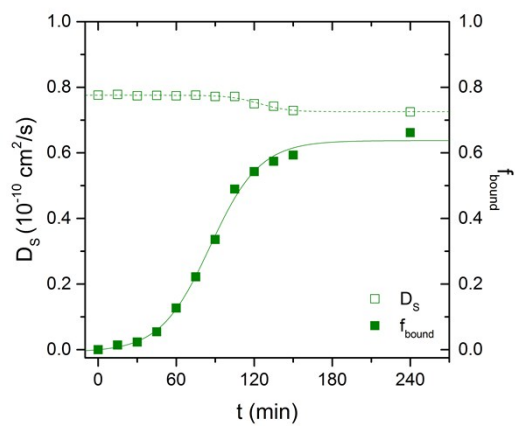

**Figure S4.** Self-diffusivity  $D_s$  of freely diffusing Fmoc-FF molecules in a slowly gelling sample ( $\phi_{\text{Fmoc-FF}} = 0.004$ ,  $x_{\text{H}_2\text{O}} = 0.35$ ) and corresponding fraction of bound molecules  $f_{\text{bound}}$ .
